# Supplementary material
Source: PubMed Central journal article supplement (PMC5837519)

Fig.S1

**A**

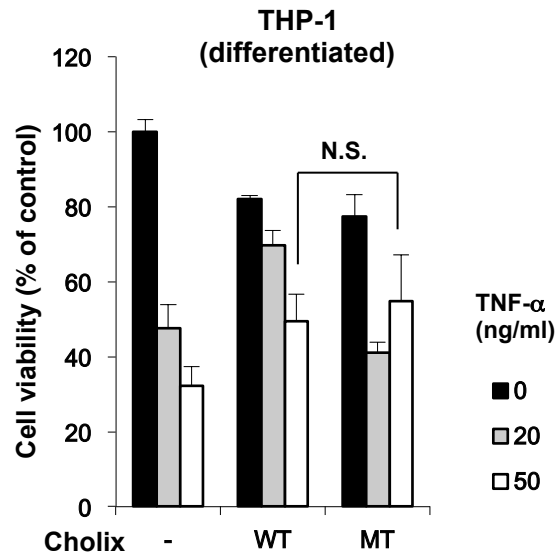

**B**

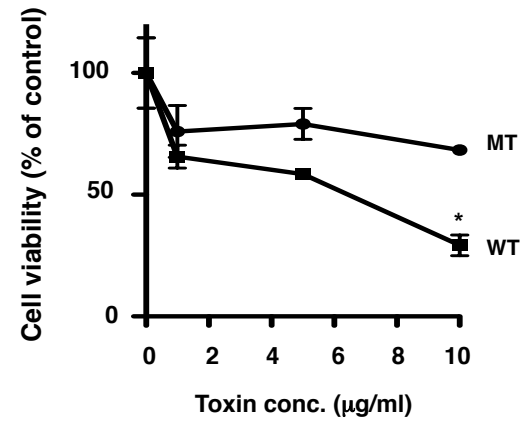

**C**

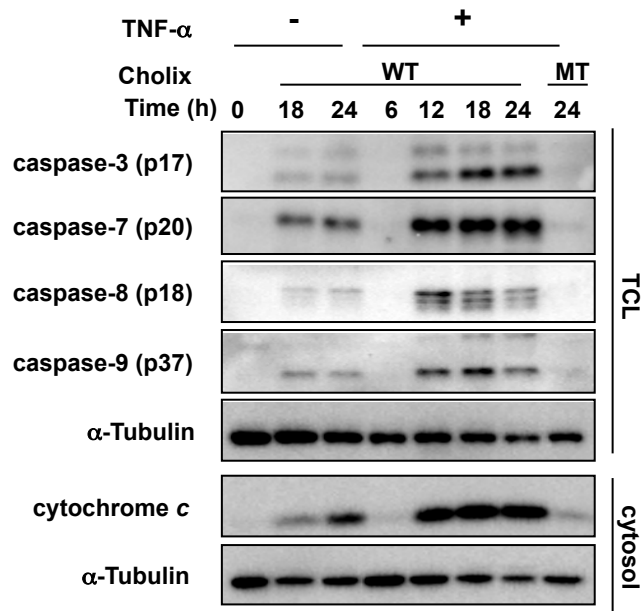

**D**

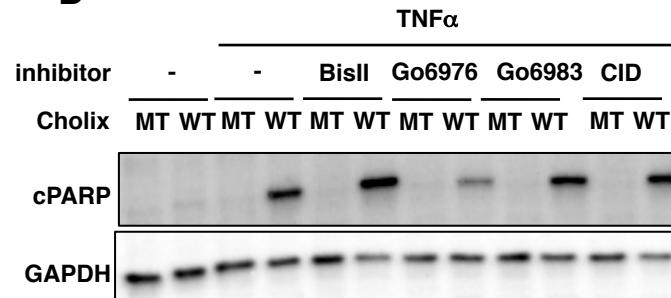

Figure S2

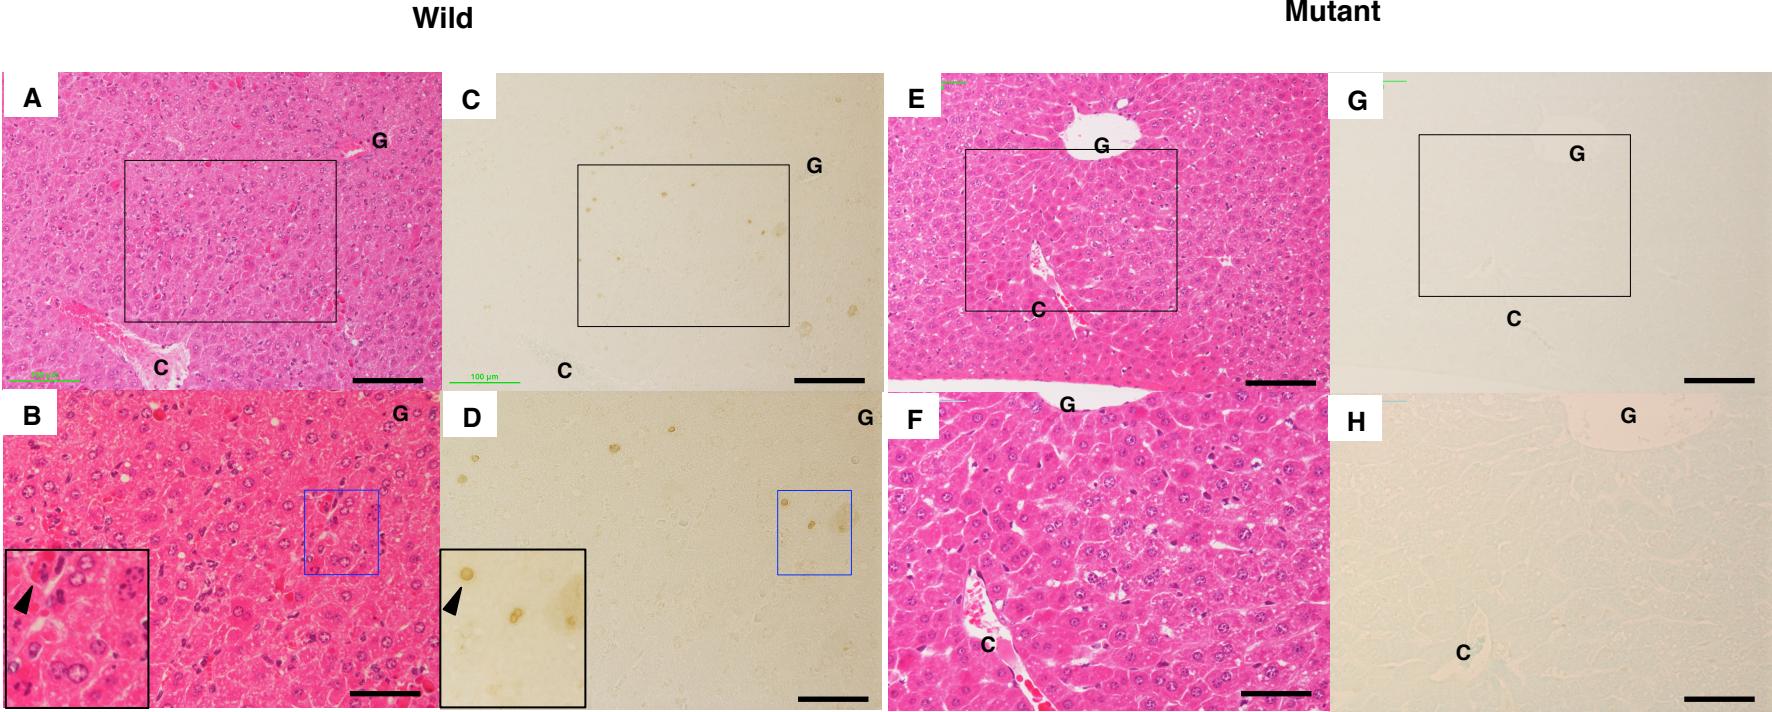

**Figure S3**

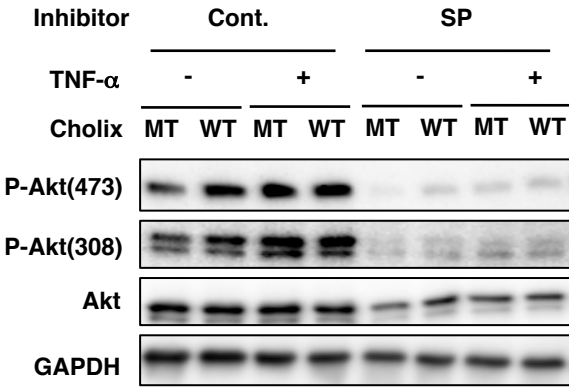

Supplement: kfx009_supp.pdf [file kfx009_supp.pdf]
